# Supplementary material for: The neuropeptide sulfakinin is a peripheral regulator of insect behavioral switch between mating and foraging
Source: bioRxiv preprint, doi:10.1101/2024.07.30.605941, version 4 (2025-05-07)
Supplement: Analysis of off-target effects of mutants [file 605941_file05.docx]

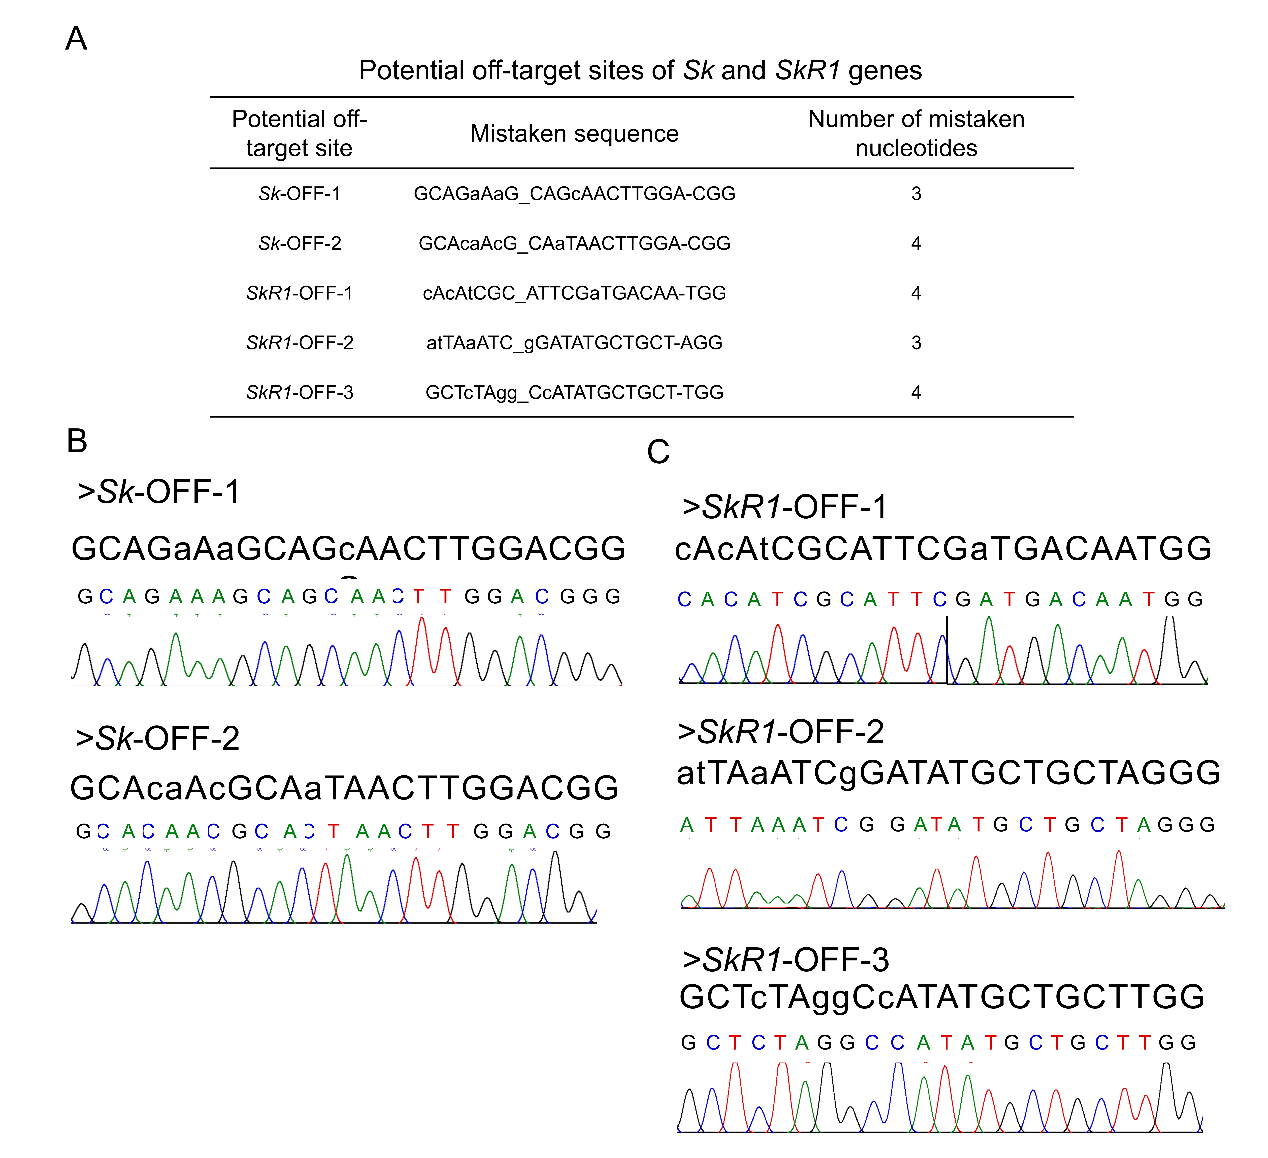


**Supplementary File 3.** Analysis of off-target effects of mutants. (*A*) Prediction of potential off-target sites of the *Sk* and *SkR1* genes. (*B*) PCR amplification and sequencing of potential off-target sites of the *Sk* gene. (*C*) PCR amplification and sequencing of potential off-target sites of the *SkR1* gene.
